# Supplementary material for: Protective effects of Bacteroides fragilis against lipopolysaccharide-induced systemic inflammation and their potential functional genes
Source: Royal Society of Chemistry journal article supplement (doi:10.1039/d1fo03073f), 2021-12-20
Supplement: d1fo03073f1.xlsx [file d1fo03073f1.xlsx]

## Sheet: SupplementaryFile1
# cluster_name	protein_list	description
cluster4329	59E1|59E1_00357;107E4|107E4_04378
cluster4704	107E4|107E4_01895;59E1|59E1_02003	Auxiliary transport protein, membrane fusion protein (MFP) family protein
cluster4705	107E4|107E4_03214;59E1|59E1_02612	Glycosyltransferase family 10 (fucosyltransferase) C-term
cluster4706	107E4|107E4_00925;59E1|59E1_03758	Belongs to the glycosyl hydrolase 2 family
cluster4707	107E4|107E4_04042;59E1|59E1_02930	Belongs to the glycosyl hydrolase 35 family
cluster4708	107E4|107E4_04037;59E1|59E1_02935	Belongs to the sigma-70 factor family. ECF subfamily
cluster4709	107E4|107E4_00927;59E1|59E1_03757
cluster4710	107E4|107E4_04380;59E1|59E1_00355
cluster4716	107E4|107E4_04382;59E1|59E1_00353
cluster4744	107E4|107E4_04381;59E1|59E1_00354
cluster4753	107E4|107E4_02532;59E1|59E1_00956
cluster4763	107E4|107E4_01894;59E1|59E1_02004	Major facilitator Superfamily
cluster4770	107E4|107E4_00366;59E1|59E1_00401
cluster4774	107E4|107E4_02568;59E1|59E1_00922	protein BT4048 SWALL AAO79153 (EMBL AE016943) (373 aa) fasta scores E()
cluster4940	59E1|59E1_00356;107E4|107E4_04379
cluster4946	59E1|59E1_02932;107E4|107E4_04040	SusD family
cluster4948	59E1|59E1_02929;107E4|107E4_04043
cluster4949	59E1|59E1_03292;107E4|107E4_00119	Helix-turn-helix XRE-family like proteins
cluster4953	59E1|59E1_00674;107E4|107E4_02935	polysaccharide biosynthetic process
cluster4954	59E1|59E1_04256;107E4|107E4_04331
cluster4957	59E1|59E1_02002;107E4|107E4_01896	Psort location OuterMembrane, score
cluster4959	59E1|59E1_02934;107E4|107E4_04038	Domain of unknown function (DUF4974)
cluster4960	59E1|59E1_02931;107E4|107E4_04041
