# Supplementary material for: Protective effects of Bacteroides fragilis against lipopolysaccharide-induced systemic inflammation and their potential functional genes
Source: Royal Society of Chemistry journal article supplement (doi:10.1039/d1fo03073f), 2021-12-20
Supplement: d1fo03073f2.xlsx [file d1fo03073f2.xlsx]

## Sheet: SupplementaryFile2
# cluster_name	protein_list	description
cluster3995	8E2|8E2_00783;59E1|59E1_00134;107E4|107E4_00708
cluster3997	8E2|8E2_04258;59E1|59E1_04037;107E4|107E4_01370	Psort location Cytoplasmic, score
cluster3999	8E2|8E2_04026;59E1|59E1_01485;107E4|107E4_01441	Psort location CytoplasmicMembrane, score
cluster4008	8E2|8E2_00425;59E1|59E1_01194;107E4|107E4_02281	Two component regulator propeller
cluster4012	8E2|8E2_00789;59E1|59E1_00140;107E4|107E4_00703
cluster4125	107E4|107E4_01823;8E2|8E2_00011;59E1|59E1_03562	Glycosyl transferases group 1
cluster4243	107E4|107E4_03608;59E1|59E1_01516;8E2|8E2_02522
cluster4244	107E4|107E4_03285;59E1|59E1_01919;8E2|8E2_04517
cluster4250	107E4|107E4_02531;59E1|59E1_00957;8E2|8E2_03736
cluster4258	107E4|107E4_00709;59E1|59E1_00133;8E2|8E2_00782
cluster4293	59E1|59E1_04038;8E2|8E2_04257;107E4|107E4_01371	Protein of unknown function (DUF1273)
cluster4300	8E2|8E2_01901;59E1|59E1_03176;107E4|107E4_01204
cluster4304	8E2|8E2_04395;59E1|59E1_03607;107E4|107E4_01134	MacB-like periplasmic core domain
cluster4305	8E2|8E2_03713;59E1|59E1_00980;107E4|107E4_02508
cluster4306	8E2|8E2_00735;59E1|59E1_00087;107E4|107E4_00757
cluster4307	8E2|8E2_00784;59E1|59E1_00135;107E4|107E4_00707
