# Supplementary material for: Protective effects of Bacteroides fragilis against lipopolysaccharide-induced systemic inflammation and their potential functional genes
Source: Royal Society of Chemistry journal article supplement (doi:10.1039/d1fo03073f), 2021-12-20
Supplement: d1fo03073f3.xlsx [file d1fo03073f3.xlsx]

## Sheet: GH2
59E1|59E1_03758	59E1_03758	100	928	0	0	1	928	1	928	0	1930	928	928
59E1|59E1_03758	107E4_00925	98.638	661	9	0	268	928	1	661	0	1359	928	661
59E1|59E1_03758	22K4_01088	39.009	928	504	22	3	916	13	892	0	619	928	923
59E1|59E1_03758	17K2_00576	39.009	928	504	22	3	916	13	892	0	619	928	923
59E1|59E1_03758	59E1_02188	39.149	917	496	22	14	916	24	892	0	616	928	923
59E1|59E1_03758	8E2_03964	39.149	917	496	22	14	916	24	892	0	616	928	923
59E1|59E1_03758	17K5_02928	39.258	917	495	22	14	916	24	892	0	615	928	923
59E1|59E1_03758	107E4_01716	39.258	917	495	22	14	916	24	892	0	615	928	923
59E1|59E1_03758	NCTC9343_00824	38.931	917	498	22	14	916	24	892	0	612	928	923
59E1|59E1_03758	107E4_00926	99.228	259	2	0	1	259	1	259	0	533	928	285
59E1|59E1_03758	22K4_01281	21.972	355	246	7	101	438	340	680	1.97e-17	87.4	928	1217
59E1|59E1_03758	17K2_00384	21.972	355	246	7	101	438	340	680	1.97e-17	87.4	928	1217
59E1|59E1_03758	8E2_00089	21.69	355	247	7	101	438	336	676	4.12e-17	86.3	928	1213
59E1|59E1_03758	107E4_01904	22.472	356	243	8	101	438	340	680	4.64e-17	86.3	928	1217
59E1|59E1_03758	59E1_01997	22.472	356	243	8	101	438	340	680	4.89e-17	86.3	928	1217
59E1|59E1_03758	NCTC9343_00639	22.472	356	243	8	101	438	340	680	5.51e-17	85.9	928	1217
59E1|59E1_03758	17K5_03568	21.69	355	247	7	101	438	340	680	9.58e-17	85.1	928	1217
59E1|59E1_03758	NCTC9343_00271	23.055	347	253	7	104	445	85	422	1.15e-16	84.3	928	586
59E1|59E1_03758	17K5_02048	23.055	347	253	7	104	445	85	422	2.23e-16	83.2	928	586
59E1|59E1_03758	107E4_02334	23.055	347	253	7	104	445	85	422	2.23e-16	83.2	928	586
59E1|59E1_03758	8E2_00479	23.055	347	253	7	104	445	93	430	2.31e-16	83.2	928	594
59E1|59E1_03758	59E1_01140	23.055	347	253	7	104	445	85	422	3.1e-16	82.8	928	586
59E1|59E1_03758	22K4_00891	23.343	347	252	7	104	445	93	430	5.69e-16	82	928	594
59E1|59E1_03758	17K2_00639	23.343	347	252	7	104	445	85	422	5.99e-16	82	928	586
59E1|59E1_03758	22K4_00887	22.673	419	280	16	104	494	105	507	8.51e-16	81.3	928	604
59E1|59E1_03758	17K2_00635	22.673	419	280	16	104	494	105	507	8.51e-16	81.3	928	604
59E1|59E1_03758	NCTC9343_00275	22.673	419	280	16	104	494	105	507	9.28e-16	81.3	928	604
59E1|59E1_03758	8E2_00475	22.673	419	280	16	104	494	105	507	9.28e-16	81.3	928	604
59E1|59E1_03758	59E1_01144	22.673	419	280	16	104	494	105	507	9.28e-16	81.3	928	604
59E1|59E1_03758	107E4_02330	22.673	419	280	16	104	494	105	507	9.28e-16	81.3	928	604
59E1|59E1_03758	17K5_02044	22.673	419	280	16	104	494	105	507	1.1e-15	81.3	928	604
59E1|59E1_03758	22K4_01017	23.478	460	291	13	10	440	40	467	8.15e-15	79	928	1034
59E1|59E1_03758	17K2_00765	23.478	460	291	13	10	440	40	467	8.15e-15	79	928	1034
59E1|59E1_03758	8E2_00615	23.478	460	291	13	10	440	40	467	8.29e-15	79	928	1034
59E1|59E1_03758	107E4_02468	23.478	460	291	13	10	440	40	467	9.03e-15	78.6	928	1034
59E1|59E1_03758	59E1_01020	23.478	460	291	13	10	440	40	467	1.28e-14	78.2	928	1034
59E1|59E1_03758	NCTC9343_00147	23.478	460	291	13	10	440	40	467	2.25e-14	77.4	928	1034
59E1|59E1_03758	17K5_02932	22.244	499	316	17	25	476	75	548	4.39e-14	76.6	928	1111
59E1|59E1_03758	8E2_03959	22.244	499	316	17	25	476	75	548	4.5e-14	76.6	928	1111
59E1|59E1_03758	107E4_01720	22.244	499	316	17	25	476	75	548	4.54e-14	76.6	928	1111
59E1|59E1_03758	59E1_02184	22.244	499	316	17	25	476	75	548	4.94e-14	76.3	928	1111
59E1|59E1_03758	22K4_01092	22.244	499	316	17	25	476	75	548	4.94e-14	76.3	928	1111
59E1|59E1_03758	17K2_00572	22.244	499	316	17	25	476	75	548	4.94e-14	76.3	928	1111
59E1|59E1_03758	17K5_02174	23.261	460	292	13	10	440	40	467	5.22e-14	76.3	928	1034
59E1|59E1_03758	NCTC9343_00820	22.244	499	316	17	25	476	75	548	5.52e-14	76.3	928	1111
59E1|59E1_03758	59E1_03679	23.733	434	280	16	104	507	86	498	1.72e-13	74.7	928	996
59E1|59E1_03758	107E4_01005	23.611	360	238	14	99	432	90	438	1.89e-11	67.8	928	891
59E1|59E1_03758	17K2_02905	23.611	360	238	14	99	432	90	438	2.57e-11	67.4	928	891
59E1|59E1_03758	NCTC9343_01589	23.611	360	238	14	99	432	90	438	3.41e-11	67	928	891
59E1|59E1_03758	8E2_03265	23.333	360	239	14	99	432	90	438	8.56e-11	65.9	928	891
59E1|59E1_03758	22K4_01330	21.229	358	242	13	99	429	84	428	3.26e-10	63.9	928	975
59E1|59E1_03758	107E4_02072	21.229	358	242	13	99	429	78	422	3.31e-10	63.9	928	969
59E1|59E1_03758	NCTC9343_00551	21.229	358	242	13	99	429	84	428	3.49e-10	63.9	928	975
59E1|59E1_03758	17K5_02536	21.229	358	242	13	99	429	78	422	3.57e-10	63.5	928	969
59E1|59E1_03758	59E1_01416	21.229	358	242	13	99	429	84	428	3.64e-10	63.5	928	975
59E1|59E1_03758	8E2_00212	21.229	358	242	13	99	429	78	422	3.83e-10	63.5	928	969
59E1|59E1_03758	17K2_01081	21.229	358	242	13	99	429	78	422	3.99e-10	63.5	928	969
59E1|59E1_03758	8E2_00699	23.36	381	229	17	98	436	81	440	9.33e-09	58.9	928	864
59E1|59E1_03758	17K5_00231	23.36	381	229	17	98	436	81	440	1.08e-08	58.9	928	864
59E1|59E1_03758	NCTC9343_01876	23.36	381	229	17	98	436	81	440	1.2e-08	58.5	928	864
59E1|59E1_03758	22K4_00020	23.36	381	229	17	98	436	81	440	1.42e-08	58.5	928	864
59E1|59E1_03758	17K2_02266	23.36	381	229	17	98	436	81	440	1.42e-08	58.5	928	864
59E1|59E1_03758	59E1_00043	23.097	381	230	17	98	436	81	440	1.54e-08	58.2	928	864
59E1|59E1_03758	59E1_01840	20.343	467	308	16	29	452	100	545	6.49e-08	56.6	928	1341
59E1|59E1_03758	8E2_04449	20.343	467	308	16	29	452	100	545	7.89e-08	56.2	928	1341
59E1|59E1_03758	17K5_03815	20.343	467	308	16	29	452	100	545	7.89e-08	56.2	928	1341
59E1|59E1_03758	107E4_03343	20.343	467	308	16	29	452	100	545	7.89e-08	56.2	928	1341
59E1|59E1_03758	NCTC9343_03181	19.899	397	274	10	29	391	100	486	8.73e-08	56.2	928	1341
59E1|59E1_03758	22K4_03308	20.343	467	308	16	29	452	100	545	1.01e-07	55.8	928	1341
59E1|59E1_03758	17K2_03856	20.343	467	308	16	29	452	100	545	1.01e-07	55.8	928	1341
59E1|59E1_03758	107E4_00791	22.835	381	231	17	98	436	81	440	1.39e-07	55.1	928	864
59E1|59E1_03758	NCTC9343_00314	19.154	402	275	14	96	465	78	461	7.61e-07	52.8	928	695
59E1|59E1_03758	22K4_00846	19.154	402	275	14	96	465	78	461	7.61e-07	52.8	928	695
59E1|59E1_03758	17K2_00595	19.154	402	275	14	96	465	78	461	7.61e-07	52.8	928	695
59E1|59E1_03758	8E2_00434	18.905	402	276	14	96	465	78	461	4.5e-06	50.1	928	695
59E1|59E1_03758	59E1_01186	18.905	402	276	14	96	465	78	461	4.98e-06	50.1	928	695
59E1|59E1_03758	17K5_04404	18.905	402	276	14	96	465	78	461	5.67e-06	50.1	928	695
59E1|59E1_03758	8E2_03188	21.007	457	312	17	1	435	5	434	6.67e-06	49.7	928	833
