# Supplementary material for: Protective effects of Bacteroides fragilis against lipopolysaccharide-induced systemic inflammation and their potential functional genes
Source: Royal Society of Chemistry journal article supplement (doi:10.1039/d1fo03073f), 2021-12-20
Supplement: d1fo03073f4.xlsx [file d1fo03073f4.xlsx]

## Sheet: GH35
59E1|59E1_02930	59E1_02930	100	886	0	0	1	886	1	886	0	1840	886	886
59E1|59E1_02930	107E4_04042	99.774	886	2	0	1	886	1	886	0	1836	886	886
59E1|59E1_02930	59E1_04125	38.202	178	100	3	64	231	42	219	6.02e-30	126	886	628
59E1|59E1_02930	NCTC9343_03784	37.64	178	101	3	64	231	42	219	2.19e-29	124	886	628
59E1|59E1_02930	107E4_04235	37.64	178	101	3	64	231	42	219	2.26e-29	124	886	628
59E1|59E1_02930	8E2_04190	37.64	178	101	3	64	231	42	219	2.3e-29	124	886	628
59E1|59E1_02930	22K4_03817	37.64	178	101	3	64	231	42	219	2.3e-29	124	886	628
59E1|59E1_02930	17K5_04499	37.64	178	101	3	64	231	42	219	2.3e-29	124	886	628
59E1|59E1_02930	17K2_03339	37.64	178	101	3	64	231	42	219	2.3e-29	124	886	628
59E1|59E1_02930	NCTC9343_04065	29.577	355	190	11	47	381	25	339	8.19e-28	119	886	624
59E1|59E1_02930	8E2_03588	29.577	355	190	11	47	381	25	339	8.19e-28	119	886	624
59E1|59E1_02930	22K4_03106	29.577	355	190	11	47	381	25	339	8.19e-28	119	886	624
59E1|59E1_02930	17K5_04454	29.577	355	190	11	47	381	25	339	8.19e-28	119	886	624
59E1|59E1_02930	107E4_04070	29.577	355	190	11	47	381	25	339	8.19e-28	119	886	624
59E1|59E1_02930	17K2_01889	29.577	355	190	11	47	381	25	339	1.26e-27	119	886	624
59E1|59E1_02930	NCTC9343_03659	25.203	369	211	9	59	412	32	350	1.98e-23	106	886	769
59E1|59E1_02930	8E2_02309	25.203	369	211	9	59	412	32	350	1.98e-23	106	886	769
59E1|59E1_02930	17K5_00642	25.203	369	211	9	59	412	32	350	1.98e-23	106	886	769
59E1|59E1_02930	59E1_02381	25.203	369	211	9	59	412	32	350	2.03e-23	106	886	769
59E1|59E1_02930	107E4_03194	25.203	369	211	9	59	412	32	350	2.23e-23	105	886	769
59E1|59E1_02930	22K4_02056	25.203	369	211	9	59	412	32	350	2.7e-23	105	886	769
59E1|59E1_02930	17K2_03171	25.203	369	211	9	59	412	32	350	2.7e-23	105	886	769
59E1|59E1_02930	8E2_00211	22.382	764	448	32	69	742	59	767	1.34e-20	97.4	886	927
59E1|59E1_02930	59E1_01417	22.382	764	448	32	69	742	59	767	1.36e-20	97.4	886	927
59E1|59E1_02930	107E4_02071	22.382	764	448	32	69	742	59	767	1.76e-20	97.1	886	927
59E1|59E1_02930	17K5_02537	23.853	436	270	15	69	475	59	461	1.82e-20	96.7	886	707
59E1|59E1_02930	22K4_01329	22.513	764	447	32	69	742	59	767	1.94e-20	97.1	886	927
59E1|59E1_02930	17K2_01080	22.513	764	447	32	69	742	59	767	1.94e-20	97.1	886	927
59E1|59E1_02930	NCTC9343_00552	22.382	764	448	32	69	742	59	767	2.61e-20	96.3	886	927
