# Supplementary material for: Protective effects of Bacteroides fragilis against lipopolysaccharide-induced systemic inflammation and their potential functional genes
Source: Royal Society of Chemistry journal article supplement (doi:10.1039/d1fo03073f), 2021-12-20
Supplement: d1fo03073f5.xlsx [file d1fo03073f5.xlsx]

## Sheet: SusD
59E1|59E1_02932	59E1_02932	100	569	0	0	1	569	1	569	0	1179	569	569
59E1|59E1_02932	107E4_04040	100	569	0	0	1	569	1	569	0	1179	569	569
59E1|59E1_02932	17K5_03873	57.996	569	230	5	3	569	4	565	0	670	569	565
59E1|59E1_02932	NCTC9343_01348	57.821	569	231	5	3	569	4	565	0	670	569	565
59E1|59E1_02932	107E4_01240	57.821	569	231	5	3	569	4	565	0	670	569	565
59E1|59E1_02932	8E2_01865	57.821	569	231	5	3	569	4	565	0	668	569	565
59E1|59E1_02932	59E1_03213	57.821	569	231	5	3	569	4	565	0	667	569	565
59E1|59E1_02932	22K4_00787	57.645	569	232	5	3	569	4	565	0	666	569	565
59E1|59E1_02932	17K2_01686	57.645	569	232	5	3	569	4	565	0	666	569	565
59E1|59E1_02932	22K4_02796	34.804	612	331	17	16	569	16	617	1.05e-102	322	569	617
59E1|59E1_02932	NCTC9343_04261	34.609	627	340	18	3	569	1	617	2.13e-102	322	569	617
59E1|59E1_02932	8E2_02983	34.609	627	340	18	3	569	1	617	2.67e-102	321	569	617
59E1|59E1_02932	17K5_03681	34.609	627	340	18	3	569	1	617	2.67e-102	321	569	617
59E1|59E1_02932	17K2_02743	34.45	627	341	18	3	569	1	617	3.87e-102	321	569	617
59E1|59E1_02932	59E1_03113	34.609	627	340	18	3	569	1	617	4e-102	321	569	617
59E1|59E1_02932	107E4_03854	34.45	627	341	18	3	569	1	617	1.45e-101	319	569	617
59E1|59E1_02932	17K5_03476	32.492	594	347	17	3	569	1	567	3.94e-85	275	569	567
59E1|59E1_02932	8E2_04234	29.005	593	341	29	3	569	1	539	1.9e-45	167	569	539
59E1|59E1_02932	59E1_04166	29.005	593	341	29	3	569	1	539	1.9e-45	167	569	539
59E1|59E1_02932	17K5_04243	29.005	593	341	29	3	569	1	539	1.9e-45	167	569	539
59E1|59E1_02932	107E4_04191	29.005	593	341	29	3	569	1	539	1.9e-45	167	569	539
59E1|59E1_02932	22K4_03862	29.174	593	340	29	3	569	1	539	2.51e-45	167	569	539
59E1|59E1_02932	17K2_03295	29.174	593	340	29	3	569	1	539	2.51e-45	167	569	539
59E1|59E1_02932	NCTC9343_03740	29.005	593	341	29	3	569	1	539	5.68e-45	166	569	539
59E1|59E1_02932	17K5_02921	27.032	603	339	26	5	569	4	543	7.06e-32	129	569	543
59E1|59E1_02932	107E4_01709	27.032	603	339	26	5	569	4	543	7.06e-32	129	569	543
59E1|59E1_02932	22K4_01081	27.032	603	339	26	5	569	4	543	7.33e-32	129	569	543
59E1|59E1_02932	17K2_00583	27.032	603	339	26	5	569	4	543	7.33e-32	129	569	543
59E1|59E1_02932	NCTC9343_00831	26.325	604	336	28	9	569	8	545	2.11e-31	127	569	545
59E1|59E1_02932	8E2_03971	26.49	604	335	29	9	569	8	545	2.93e-31	127	569	545
59E1|59E1_02932	59E1_02195	26.325	604	336	29	9	569	8	545	4.14e-31	127	569	545
59E1|59E1_02932	8E2_00213	28.214	599	315	30	3	566	1	519	1.48e-29	122	569	522
59E1|59E1_02932	59E1_01415	28.214	599	315	30	3	566	1	519	1.48e-29	122	569	522
59E1|59E1_02932	NCTC9343_02879	25.691	615	356	22	3	569	1	562	8.62e-29	120	569	562
59E1|59E1_02932	22K4_04477	25.691	615	356	22	3	569	1	562	8.62e-29	120	569	562
59E1|59E1_02932	17K5_01770	25.691	615	356	22	3	569	1	562	8.62e-29	120	569	562
59E1|59E1_02932	17K2_04166	25.691	615	356	22	3	569	1	562	8.62e-29	120	569	562
59E1|59E1_02932	8E2_02480	25.691	615	356	22	3	569	1	562	1.73e-28	119	569	562
59E1|59E1_02932	107E4_03643	25.691	615	356	22	3	569	1	562	1.73e-28	119	569	562
59E1|59E1_02932	22K4_01331	27.045	599	322	30	3	566	1	519	4.15e-28	117	569	522
59E1|59E1_02932	17K5_02535	27.045	599	322	30	3	566	1	519	4.15e-28	117	569	522
59E1|59E1_02932	17K2_01082	27.045	599	322	30	3	566	1	519	4.15e-28	117	569	522
59E1|59E1_02932	107E4_02073	27.045	599	322	30	3	566	1	519	4.15e-28	117	569	522
59E1|59E1_02932	NCTC9343_00550	27.045	599	322	30	3	566	1	519	8.61e-28	117	569	522
59E1|59E1_02932	NCTC9343_00366	23.89	653	323	24	3	569	1	565	3.87e-25	109	569	565
59E1|59E1_02932	22K4_01503	23.89	653	323	24	3	569	1	565	3.94e-25	109	569	565
59E1|59E1_02932	17K2_01254	23.89	653	323	24	3	569	1	565	3.94e-25	109	569	565
59E1|59E1_02932	22K4_04311	25.914	602	344	26	3	569	1	535	5.86e-25	108	569	535
59E1|59E1_02932	17K2_04108	25.914	602	344	26	3	569	1	535	5.86e-25	108	569	535
59E1|59E1_02932	59E1_01242	24.154	650	325	24	3	569	1	565	8.04e-25	108	569	565
59E1|59E1_02932	17K5_03451	24.154	650	325	24	3	569	1	565	8.04e-25	108	569	565
59E1|59E1_02932	107E4_02239	24.154	650	325	24	3	569	1	565	8.04e-25	108	569	565
59E1|59E1_02932	17K5_00419	26.612	605	335	28	3	563	1	540	2.03e-24	106	569	542
59E1|59E1_02932	17K5_04344	25.748	602	345	26	3	569	1	535	3.56e-24	105	569	535
59E1|59E1_02932	107E4_03253	25.748	602	345	26	3	569	1	535	3.56e-24	105	569	535
59E1|59E1_02932	8E2_00383	23.846	650	327	24	3	569	1	565	3.56e-24	106	569	565
59E1|59E1_02932	59E1_04230	25.748	602	345	26	3	569	1	535	3.93e-24	105	569	535
59E1|59E1_02932	8E2_02368	25.581	602	346	26	3	569	1	535	4.19e-24	105	569	535
59E1|59E1_02932	NCTC9343_03712	25.581	602	346	26	3	569	1	535	5.8e-24	105	569	535
59E1|59E1_02932	NCTC9343_02912	24.096	664	379	26	3	569	1	636	7.17e-24	105	569	636
59E1|59E1_02932	59E1_01512	24.096	664	379	26	3	569	1	636	7.17e-24	105	569	636
59E1|59E1_02932	22K4_04503	24.096	664	379	26	3	569	1	636	7.17e-24	105	569	636
59E1|59E1_02932	17K2_04191	24.096	664	379	26	3	569	1	636	7.17e-24	105	569	636
59E1|59E1_02932	107E4_03612	24.096	664	379	26	3	569	1	636	7.17e-24	105	569	636
59E1|59E1_02932	8E2_02518	23.946	664	380	26	3	569	1	636	7.7e-24	105	569	636
59E1|59E1_02932	17K5_01740	24.096	664	379	26	3	569	1	636	7.77e-24	105	569	636
59E1|59E1_02932	NCTC9343_01437	25.213	587	358	23	10	565	4	540	5.59e-23	102	569	545
59E1|59E1_02932	8E2_02205	25.792	663	361	34	3	569	1	628	1.52e-22	101	569	628
59E1|59E1_02932	59E1_02489	25.792	663	361	34	3	569	1	628	1.52e-22	101	569	628
59E1|59E1_02932	8E2_02391	25.043	587	359	23	10	565	4	540	1.63e-22	100	569	545
59E1|59E1_02932	22K4_03151	25.043	587	359	23	10	565	4	540	1.63e-22	100	569	545
59E1|59E1_02932	17K5_01835	25.043	587	359	23	10	565	4	540	1.63e-22	100	569	545
59E1|59E1_02932	17K2_01935	25.043	587	359	23	10	565	4	540	1.63e-22	100	569	545
59E1|59E1_02932	107E4_02692	25.043	587	359	23	10	565	4	540	1.63e-22	100	569	545
59E1|59E1_02932	NCTC9343_03570	25.457	656	372	33	3	569	1	628	1.86e-22	101	569	628
59E1|59E1_02932	22K4_02612	25.457	656	372	33	3	569	1	628	1.86e-22	101	569	628
59E1|59E1_02932	17K2_02620	25.457	656	372	33	3	569	1	628	1.86e-22	101	569	628
59E1|59E1_02932	107E4_03057	25.457	656	372	33	3	569	1	628	1.86e-22	101	569	628
59E1|59E1_02932	17K5_00816	25.457	656	372	33	3	569	1	628	2.56e-22	100	569	628
59E1|59E1_02932	NCTC9343_03567	24.581	537	306	24	94	569	115	613	5.16e-22	99.8	569	613
59E1|59E1_02932	8E2_02202	24.581	537	306	24	94	569	115	613	5.16e-22	99.8	569	613
59E1|59E1_02932	17K5_00819	24.581	537	306	24	94	569	115	613	5.16e-22	99.8	569	613
59E1|59E1_02932	107E4_03054	24.581	537	306	24	94	569	115	613	5.16e-22	99.8	569	613
59E1|59E1_02932	59E1_02492	24.581	537	306	24	94	569	115	613	5.25e-22	99.8	569	613
59E1|59E1_02932	22K4_02615	24.581	537	306	24	94	569	115	613	5.29e-22	99.8	569	613
59E1|59E1_02932	17K2_02623	24.581	537	306	24	94	569	115	613	5.29e-22	99.8	569	613
59E1|59E1_02932	8E2_00470	24.115	593	329	25	3	514	1	553	1.55e-21	98.2	569	617
59E1|59E1_02932	17K5_02039	24.115	593	329	25	3	514	1	553	1.55e-21	98.2	569	617
59E1|59E1_02932	NCTC9343_00944	23.539	599	365	24	3	563	1	544	2.94e-20	94	569	546
59E1|59E1_02932	8E2_01485	23.539	599	365	24	3	563	1	544	2.94e-20	94	569	546
59E1|59E1_02932	22K4_01663	23.539	599	365	24	3	563	1	544	2.94e-20	94	569	546
59E1|59E1_02932	17K5_01399	23.539	599	365	24	3	563	1	544	2.94e-20	94	569	546
59E1|59E1_02932	17K2_01402	23.539	599	365	24	3	563	1	544	2.94e-20	94	569	546
59E1|59E1_02932	107E4_01595	23.539	599	365	24	3	563	1	544	2.94e-20	94	569	546
59E1|59E1_02932	NCTC9343_00840	23.772	631	380	24	3	569	1	594	3.04e-20	94.4	569	594
59E1|59E1_02932	8E2_01379	23.772	631	380	24	3	569	1	594	3.04e-20	94.4	569	594
59E1|59E1_02932	59E1_02309	23.205	599	367	24	3	563	1	544	4.35e-20	93.6	569	546
59E1|59E1_02932	59E1_02205	23.613	631	381	24	3	569	1	594	7.04e-20	93.2	569	594
59E1|59E1_02932	22K4_04647	23.772	631	380	24	3	569	1	594	7.1e-20	93.2	569	594
59E1|59E1_02932	17K5_01502	23.772	631	380	24	3	569	1	594	7.1e-20	93.2	569	594
59E1|59E1_02932	17K2_01297	23.772	631	380	24	3	569	1	594	7.1e-20	93.2	569	594
59E1|59E1_02932	107E4_01699	23.772	631	380	24	3	569	1	594	7.1e-20	93.2	569	594
59E1|59E1_02932	8E2_04604	22.771	628	368	23	10	569	8	586	3.08e-19	90.9	569	586
59E1|59E1_02932	8E2_01937	24.813	669	351	32	3	569	1	619	4.58e-19	90.5	569	621
59E1|59E1_02932	17K5_04541	22.611	628	369	23	10	569	8	586	6.29e-19	90.1	569	586
59E1|59E1_02932	107E4_01707	22.611	628	369	23	10	569	8	586	6.29e-19	90.1	569	586
59E1|59E1_02932	NCTC9343_00833	22.611	628	369	23	10	569	8	586	6.94e-19	89.7	569	586
59E1|59E1_02932	59E1_02197	22.611	628	369	23	10	569	8	586	6.94e-19	89.7	569	586
59E1|59E1_02932	22K4_04721	22.611	628	369	23	10	569	8	586	6.94e-19	89.7	569	586
59E1|59E1_02932	17K2_00585	22.611	628	369	23	10	569	8	586	6.94e-19	89.7	569	586
59E1|59E1_02932	NCTC9343_03292	24.664	669	352	31	3	569	1	619	7.98e-19	89.7	569	621
59E1|59E1_02932	59E1_02772	24.664	669	352	31	3	569	1	619	7.98e-19	89.7	569	621
59E1|59E1_02932	22K4_02557	24.664	669	352	31	3	569	1	619	7.98e-19	89.7	569	621
59E1|59E1_02932	17K5_02350	24.664	669	352	31	3	569	1	619	7.98e-19	89.7	569	621
59E1|59E1_02932	17K2_02072	24.664	669	352	31	3	569	1	619	7.98e-19	89.7	569	621
59E1|59E1_02932	107E4_02782	24.664	669	352	31	3	569	1	619	7.98e-19	89.7	569	621
59E1|59E1_02932	59E1_01149	23.946	593	338	22	8	520	1	560	5.53e-18	87	569	621
59E1|59E1_02932	NCTC9343_00280	23.786	597	334	24	8	520	1	560	1.25e-17	85.9	569	621
59E1|59E1_02932	22K4_03255	23.023	569	349	20	4	533	3	521	1.79e-17	85.1	569	539
59E1|59E1_02932	17K2_03800	23.023	569	349	20	4	533	3	521	1.79e-17	85.1	569	539
59E1|59E1_02932	NCTC9343_03237	22.847	569	350	20	4	533	3	521	4.52e-17	84	569	539
59E1|59E1_02932	8E2_04515	22.847	569	350	20	4	533	3	521	4.52e-17	84	569	539
59E1|59E1_02932	59E1_01917	22.847	569	350	20	4	533	3	521	4.52e-17	84	569	539
59E1|59E1_02932	17K5_03757	22.847	569	350	20	4	533	3	521	4.52e-17	84	569	539
59E1|59E1_02932	107E4_03287	22.847	569	350	20	4	533	3	521	4.52e-17	84	569	539
59E1|59E1_02932	NCTC9343_00734	26.136	616	345	32	3	569	1	555	1.23e-15	79.7	569	555
59E1|59E1_02932	59E1_02098	26.136	616	345	32	3	569	1	555	1.23e-15	79.7	569	555
59E1|59E1_02932	8E2_03064	25.836	538	273	27	1	498	10	461	1.24e-15	79.3	569	506
59E1|59E1_02932	22K4_03987	25.836	538	273	27	1	498	10	461	1.36e-15	79.3	569	506
59E1|59E1_02932	17K5_03146	25.836	538	273	27	1	498	10	461	1.36e-15	79.3	569	506
59E1|59E1_02932	17K2_02824	25.836	538	273	27	1	498	10	461	1.36e-15	79.3	569	506
59E1|59E1_02932	107E4_03947	25.836	538	273	27	1	498	10	461	1.36e-15	79.3	569	506
59E1|59E1_02932	22K4_00882	23.693	574	332	22	1	503	1	539	1.52e-15	79.3	569	615
59E1|59E1_02932	17K2_00630	23.693	574	332	22	1	503	1	539	1.52e-15	79.3	569	615
59E1|59E1_02932	107E4_02325	23.693	574	332	22	1	503	1	539	1.52e-15	79.3	569	615
59E1|59E1_02932	22K4_01179	26.136	616	345	31	3	569	1	555	1.55e-15	79.3	569	555
59E1|59E1_02932	17K2_00486	26.136	616	345	31	3	569	1	555	1.55e-15	79.3	569	555
59E1|59E1_02932	8E2_03871	25.733	614	350	30	3	569	1	555	1.61e-15	79.3	569	555
59E1|59E1_02932	NCTC9343_04177	25.836	538	273	27	1	498	10	461	1.72e-15	79	569	506
59E1|59E1_02932	59E1_03018	25.836	538	273	27	1	498	10	461	2.14e-15	78.6	569	506
59E1|59E1_02932	17K5_03017	26.136	616	345	31	3	569	1	555	3.36e-15	78.2	569	555
59E1|59E1_02932	107E4_01806	25.974	616	346	32	3	569	1	555	4.34e-15	77.8	569	555
59E1|59E1_02932	8E2_00542	24.451	638	389	29	3	569	1	616	6.77e-15	77.4	569	616
59E1|59E1_02932	107E4_01072	27.536	276	161	12	2	250	5	268	9.28e-15	76.6	569	534
59E1|59E1_02932	107E4_01907	23.895	611	371	21	1	569	1	559	1.63e-14	75.9	569	560
59E1|59E1_02932	NCTC9343_00636	23.895	611	371	21	1	569	1	559	2e-14	75.9	569	560
59E1|59E1_02932	59E1_01994	23.895	611	371	21	1	569	1	559	2e-14	75.9	569	560
59E1|59E1_02932	22K4_01284	23.895	611	371	21	1	569	1	559	2e-14	75.9	569	560
59E1|59E1_02932	17K5_03571	23.895	611	371	21	1	569	1	559	2e-14	75.9	569	560
59E1|59E1_02932	17K2_00381	23.895	611	371	21	1	569	1	559	2e-14	75.9	569	560
59E1|59E1_02932	8E2_00092	23.895	611	371	21	1	569	1	559	3.79e-14	74.7	569	560
59E1|59E1_02932	8E2_03586	26.545	275	165	12	5	250	2	268	1.58e-12	69.7	569	534
59E1|59E1_02932	107E4_04068	26.545	275	165	12	5	250	2	268	1.65e-12	69.7	569	534
59E1|59E1_02932	NCTC9343_04067	26.545	275	165	12	5	250	2	268	2.47e-12	68.9	569	534
59E1|59E1_02932	22K4_03108	26.545	275	165	12	5	250	2	268	2.47e-12	68.9	569	534
59E1|59E1_02932	17K2_01891	26.545	275	165	12	5	250	2	268	2.47e-12	68.9	569	534
59E1|59E1_02932	NCTC9343_01731	23.272	593	330	26	1	503	1	558	7.44e-11	64.7	569	671
59E1|59E1_02932	17K5_00002	23.272	593	330	26	1	503	1	558	1.05e-10	64.3	569	671
59E1|59E1_02932	59E1_03743	23.272	593	330	26	1	503	1	558	1.09e-10	63.9	569	671
59E1|59E1_02932	17K2_02431	23.272	593	330	26	1	503	1	558	1.09e-10	63.9	569	671
59E1|59E1_02932	107E4_00941	23.272	593	330	26	1	503	1	558	1.09e-10	63.9	569	671
59E1|59E1_02932	NCTC9343_00326	28.07	285	167	13	1	264	1	268	1.16e-10	63.5	569	506
59E1|59E1_02932	59E1_01198	28.07	285	167	13	1	264	1	268	1.16e-10	63.5	569	506
59E1|59E1_02932	107E4_02277	28.07	285	167	13	1	264	1	268	1.16e-10	63.5	569	506
59E1|59E1_02932	8E2_03199	22.945	584	329	25	6	503	16	564	1.46e-10	63.5	569	677
59E1|59E1_02932	22K4_04730	22.167	600	334	25	19	569	11	526	1.67e-10	63.2	569	528
59E1|59E1_02932	17K5_04409	21.914	648	390	25	2	569	3	614	2.06e-10	63.2	569	615
59E1|59E1_02932	8E2_00421	27.599	279	164	13	6	264	8	268	2.19e-10	62.8	569	506
59E1|59E1_02932	22K4_01541	27.599	279	164	13	6	264	8	268	2.36e-10	62.8	569	506
59E1|59E1_02932	17K5_03499	27.599	279	164	13	6	264	8	268	2.36e-10	62.8	569	506
59E1|59E1_02932	17K2_01292	27.599	279	164	13	6	264	8	268	2.36e-10	62.8	569	506
59E1|59E1_02932	17K5_04572	22.167	600	334	25	19	569	11	526	2.5e-10	62.8	569	528
59E1|59E1_02932	107E4_00951	22.167	600	334	25	19	569	11	526	2.5e-10	62.8	569	528
59E1|59E1_02932	22K4_04453	23.103	593	331	26	1	503	1	558	3.89e-10	62.4	569	671
59E1|59E1_02932	22K4_00841	22.188	649	388	26	3	569	1	614	6.43e-10	61.6	569	615
59E1|59E1_02932	17K2_00590	22.188	649	388	26	3	569	1	614	6.43e-10	61.6	569	615
59E1|59E1_02932	107E4_02284	22.188	649	388	26	3	569	1	614	6.43e-10	61.6	569	615
59E1|59E1_02932	NCTC9343_00319	22.188	649	388	26	3	569	1	614	6.65e-10	61.6	569	615
59E1|59E1_02932	8E2_00428	21.966	651	387	26	3	569	1	614	6.89e-10	61.6	569	615
59E1|59E1_02932	59E1_01191	22.034	649	389	26	3	569	1	614	1.02e-09	60.8	569	615
59E1|59E1_02932	59E1_03725	25.847	236	150	8	1	213	1	234	2.53e-09	59.3	569	527
59E1|59E1_02932	NCTC9343_00218	22.171	645	393	28	3	569	1	614	1.01e-08	57.8	569	614
59E1|59E1_02932	59E1_01087	22.171	645	393	28	3	569	1	614	1.01e-08	57.8	569	614
59E1|59E1_02932	17K5_02101	22.171	645	393	28	3	569	1	614	1.01e-08	57.8	569	614
59E1|59E1_02932	107E4_02392	22.171	645	393	28	3	569	1	614	1.01e-08	57.8	569	614
59E1|59E1_02932	22K4_00944	22.171	645	393	28	3	569	1	614	1.29e-08	57.4	569	614
59E1|59E1_02932	17K2_00692	22.171	645	393	28	3	569	1	614	1.29e-08	57.4	569	614
59E1|59E1_02932	8E2_02356	23.874	222	161	5	3	219	1	219	2.11e-08	56.6	569	486
59E1|59E1_02932	17K5_04356	23.874	222	161	5	3	219	1	219	2.11e-08	56.6	569	486
59E1|59E1_02932	107E4_03241	23.874	222	161	5	3	219	1	219	2.11e-08	56.6	569	486
59E1|59E1_02932	59E1_03729	22.575	598	334	28	19	569	11	526	3.26e-08	55.8	569	528
59E1|59E1_02932	8E2_02985	26.389	216	135	8	19	217	20	228	3.85e-08	55.8	569	666
59E1|59E1_02932	NCTC9343_01723	22.575	598	334	28	19	569	11	526	4.09e-08	55.5	569	528
59E1|59E1_02932	17K5_03678	26.389	216	135	8	19	217	20	228	4.12e-08	55.8	569	666
59E1|59E1_02932	NCTC9343_04258	26.389	216	135	8	19	217	20	228	4.3e-08	55.8	569	666
59E1|59E1_02932	107E4_03857	26.389	216	135	8	19	217	20	228	4.3e-08	55.8	569	666
59E1|59E1_02932	59E1_04242	23.874	222	161	5	3	219	1	219	4.59e-08	55.5	569	486
59E1|59E1_02932	59E1_01670	23.024	291	198	12	3	276	1	282	8.97e-08	54.7	569	621
59E1|59E1_02932	22K4_01786	23.024	291	198	12	3	276	1	282	9.21e-08	54.7	569	621
59E1|59E1_02932	17K2_00913	23.024	291	198	12	3	276	1	282	9.21e-08	54.7	569	621
59E1|59E1_02932	NCTC9343_03700	23.423	222	162	5	3	219	1	219	1.17e-07	53.9	569	486
59E1|59E1_02932	8E2_02832	23.051	295	193	12	3	276	1	282	1.28e-07	54.3	569	621
59E1|59E1_02932	59E1_03723	23.651	241	149	10	3	210	1	239	1.69e-07	53.5	569	545
59E1|59E1_02932	NCTC9343_00479	24.339	567	316	27	1	500	1	521	2e-07	53.5	569	571
59E1|59E1_02932	8E2_00283	24.339	567	316	27	1	500	1	521	2e-07	53.5	569	571
59E1|59E1_02932	17K5_02465	24.339	567	316	27	1	500	1	521	2e-07	53.5	569	571
59E1|59E1_02932	59E1_01344	24.339	567	316	27	1	500	1	521	2.06e-07	53.5	569	571
59E1|59E1_02932	107E4_02143	24.339	567	316	27	1	500	1	521	2.49e-07	53.1	569	571
59E1|59E1_02932	22K4_04299	23.423	222	162	5	3	219	1	219	2.75e-07	52.8	569	486
59E1|59E1_02932	17K2_04120	23.423	222	162	5	3	219	1	219	2.75e-07	52.8	569	486
59E1|59E1_02932	NCTC9343_00574	25.461	271	167	11	3	247	1	262	2.8e-07	52.8	569	499
59E1|59E1_02932	59E1_04302	25.461	271	167	11	3	247	1	262	2.8e-07	52.8	569	499
59E1|59E1_02932	22K4_04763	25.461	271	167	11	3	247	1	262	2.8e-07	52.8	569	499
59E1|59E1_02932	17K5_04579	25.461	271	167	11	3	247	1	262	2.8e-07	52.8	569	499
59E1|59E1_02932	17K2_04408	25.461	271	167	11	3	247	1	262	2.8e-07	52.8	569	499
59E1|59E1_02932	107E4_01985	25.461	271	167	11	3	247	1	262	2.8e-07	52.8	569	499
59E1|59E1_02932	8E2_00168	25.461	271	167	11	3	247	1	262	2.83e-07	52.8	569	499
59E1|59E1_02932	NCTC9343_01644	25.818	275	174	11	3	251	1	271	2.83e-07	52.8	569	520
59E1|59E1_02932	8E2_03213	25.818	275	174	11	3	251	1	271	2.83e-07	52.8	569	520
59E1|59E1_02932	59E1_03739	25.818	275	174	11	3	251	1	271	2.83e-07	52.8	569	520
59E1|59E1_02932	17K5_04543	25.818	275	174	11	3	251	1	271	2.83e-07	52.8	569	520
59E1|59E1_02932	17K2_04359	25.818	275	174	11	3	251	1	271	2.83e-07	52.8	569	520
59E1|59E1_02932	107E4_00945	25.818	275	174	11	3	251	1	271	2.83e-07	52.8	569	520
59E1|59E1_02932	17K5_01654	23.024	291	198	12	3	276	1	282	3.2e-07	52.8	569	621
59E1|59E1_02932	107E4_03456	23.024	291	198	12	3	276	1	282	3.2e-07	52.8	569	621
59E1|59E1_02932	22K4_04724	25.818	275	174	11	3	251	1	271	3.28e-07	52.8	569	520
59E1|59E1_02932	107E4_00928	23.176	233	138	10	20	218	20	245	4.14e-07	52.4	569	543
59E1|59E1_02932	22K4_04466	23.176	233	138	10	20	218	20	245	4.25e-07	52.4	569	543
59E1|59E1_02932	17K2_02418	23.176	233	138	10	20	218	20	245	4.25e-07	52.4	569	543
59E1|59E1_02932	8E2_03186	23.176	233	138	10	20	218	20	245	4.63e-07	52.4	569	543
59E1|59E1_02932	NCTC9343_01744	23.176	233	138	10	20	218	20	245	5.23e-07	52	569	543
59E1|59E1_02932	59E1_03756	23.176	233	138	10	20	218	20	245	5.51e-07	52	569	543
59E1|59E1_02932	17K5_00015	23.176	233	138	10	20	218	20	245	7.59e-07	51.6	569	543
59E1|59E1_02932	107E4_03848	23.984	246	144	10	1	215	1	234	7.99e-07	51.6	569	675
59E1|59E1_02932	NCTC9343_04269	23.577	246	145	10	1	215	1	234	1.09e-06	51.2	569	675
59E1|59E1_02932	8E2_02974	23.577	246	145	10	1	215	1	234	1.09e-06	51.2	569	675
59E1|59E1_02932	59E1_03121	23.577	246	145	10	1	215	1	234	1.09e-06	51.2	569	675
59E1|59E1_02932	22K4_02788	23.577	246	145	10	1	215	1	234	1.09e-06	51.2	569	675
59E1|59E1_02932	17K5_03688	23.577	246	145	10	1	215	1	234	1.09e-06	51.2	569	675
59E1|59E1_02932	17K2_03864	23.577	246	145	10	1	215	1	234	1.09e-06	51.2	569	675
59E1|59E1_02932	17K5_04539	21.931	611	367	27	3	539	1	575	1.27e-06	50.8	569	588
59E1|59E1_02932	NCTC9343_03069	22.68	291	199	12	3	276	1	282	1.28e-06	50.8	569	621
59E1|59E1_02932	NCTC9343_00835	21.931	611	367	27	3	539	1	575	1.89e-06	50.4	569	588
59E1|59E1_02932	8E2_04602	21.931	611	367	27	3	539	1	575	1.89e-06	50.4	569	588
59E1|59E1_02932	59E1_02199	21.931	611	367	27	3	539	1	575	1.89e-06	50.4	569	588
59E1|59E1_02932	22K4_04719	21.931	611	367	27	3	539	1	575	1.89e-06	50.4	569	588
59E1|59E1_02932	107E4_01701	21.931	611	367	27	3	539	1	575	1.89e-06	50.4	569	588
59E1|59E1_02932	NCTC9343_00861	24.37	238	151	7	3	215	1	234	2.7e-06	50.1	569	680
59E1|59E1_02932	NCTC9343_01640	21.835	316	192	12	3	282	1	297	2.7e-06	49.7	569	522
59E1|59E1_02932	8E2_03216	21.835	316	192	12	3	282	1	297	2.7e-06	49.7	569	522
59E1|59E1_02932	17K2_04382	21.835	316	192	12	3	282	1	297	2.7e-06	49.7	569	522
59E1|59E1_02932	107E4_00958	21.835	316	192	12	3	282	1	297	2.7e-06	49.7	569	522
59E1|59E1_02932	59E1_02226	24.37	238	151	7	3	215	1	234	2.77e-06	50.1	569	680
59E1|59E1_02932	17K5_01483	24.37	238	151	7	3	215	1	234	2.77e-06	50.1	569	680
59E1|59E1_02932	107E4_01679	24.37	238	151	7	3	215	1	234	2.77e-06	50.1	569	680
59E1|59E1_02932	17K2_00587	23.207	474	284	19	123	539	125	575	2.84e-06	49.7	569	588
59E1|59E1_02932	NCTC9343_00576	28.78	205	116	9	3	179	1	203	3.1e-06	49.7	569	464
59E1|59E1_02932	8E2_00166	28.78	205	116	9	3	179	1	203	3.1e-06	49.7	569	464
59E1|59E1_02932	22K4_04412	28.78	205	116	9	3	179	1	203	3.1e-06	49.7	569	464
59E1|59E1_02932	17K5_03908	28.78	205	116	9	3	179	1	203	3.1e-06	49.7	569	464
59E1|59E1_02932	17K2_04161	28.78	205	116	9	3	179	1	203	3.1e-06	49.7	569	464
59E1|59E1_02932	107E4_01981	28.78	205	116	9	3	179	1	203	3.1e-06	49.7	569	464
59E1|59E1_02932	8E2_01400	24.37	238	151	7	3	215	1	234	3.13e-06	49.7	569	680
59E1|59E1_02932	22K4_01747	24.37	238	151	7	3	215	1	234	3.13e-06	49.7	569	680
59E1|59E1_02932	17K2_01318	24.37	238	151	7	3	215	1	234	3.13e-06	49.7	569	680
59E1|59E1_02932	59E1_01933	28.78	205	116	9	3	179	1	203	3.27e-06	49.3	569	464
59E1|59E1_02932	22K4_00502	23.874	222	146	6	16	215	4	224	8.63e-06	48.5	569	679
59E1|59E1_02932	17K2_00029	23.874	222	146	6	16	215	4	224	8.63e-06	48.5	569	679
