# Supplementary material for: Protective effects of Bacteroides fragilis against lipopolysaccharide-induced systemic inflammation and their potential functional genes
Source: Royal Society of Chemistry journal article supplement (doi:10.1039/d1fo03073f), 2021-12-20
Supplement: d1fo03073f6.xlsx [file d1fo03073f6.xlsx]

## Sheet: WbjE
8E2|8E2_00011	8E2_00011	100	350	0	0	1	350	1	350	0	721	350	359
8E2|8E2_00011	107E4_01823	99.429	350	2	0	1	350	1	350	0	717	350	359
8E2|8E2_00011	59E1_03562	28.621	290	195	8	30	310	59	345	1.17e-30	119	350	399
8E2|8E2_00011	8E2_01526	28.782	271	176	9	68	329	101	363	2.78e-26	107	350	403
8E2|8E2_00011	8E2_00659	27.113	284	192	8	64	336	95	374	4.04e-24	101	350	403
8E2|8E2_00011	NCTC9343_01839	27.113	284	192	8	64	336	95	374	4.12e-24	101	350	403
8E2|8E2_00011	17K2_02303	27.113	284	192	8	64	336	95	374	4.54e-24	101	350	403
8E2|8E2_00011	107E4_00833	27.007	274	187	7	64	328	95	364	1.07e-23	100	350	403
8E2|8E2_00011	17K5_03032	22.925	253	179	7	70	310	97	345	8.65e-14	71.6	350	404
8E2|8E2_00011	NCTC9343_00722	24.746	295	200	11	70	350	100	386	9.6e-14	71.2	350	405
8E2|8E2_00011	22K4_00741	25.652	230	155	8	76	292	121	347	9.24e-12	65.5	350	421
8E2|8E2_00011	17K2_01641	25.652	230	155	8	76	292	121	347	9.24e-12	65.5	350	421
8E2|8E2_00011	17K5_01355	21.811	243	176	6	66	296	93	333	1.88e-11	64.3	350	402
8E2|8E2_00011	107E4_01549	21.811	243	176	6	66	296	93	333	1.88e-11	64.3	350	402
8E2|8E2_00011	59E1_02088	21.811	243	176	6	66	296	93	333	1.95e-11	64.3	350	402
